# Supplementary material
Source: PubMed Central journal article supplement (PMC3425198)
Supplement: supp_pp.112.199257_199257revsupplemental_figures.pdf [file supp_pp.112.199257_199257revsupplemental_figures.pdf]

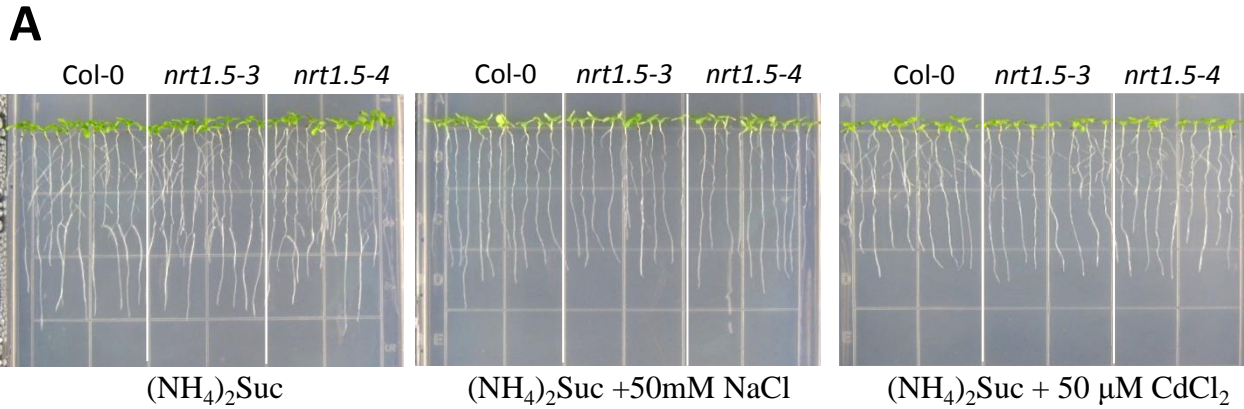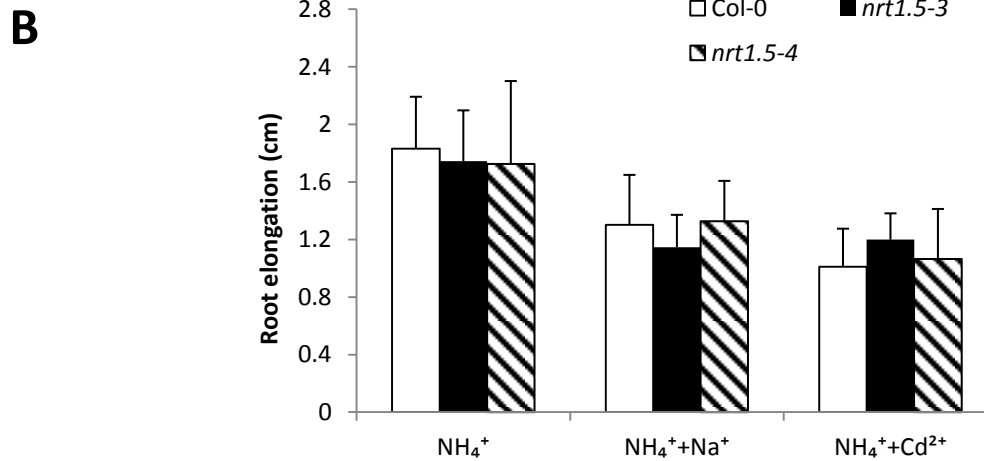

**Figure S1.** Enhanced stress tolerance in *nrt1.5* mutants is nitrate-dependent. Seedlings were germinated on plates with 5mM (NH<sub>4</sub>)<sub>2</sub>succinate, then were transferred to the control plates (left), plates supplemented with 50 mM NaCl (middle), or plates with 50 μM CdCl<sub>2</sub> (right). Plants grew vertically for an additional 6 days before imaging (A) and determination of root elongation rate (B) as described in Methods. Values are mean ± SD, n=8.

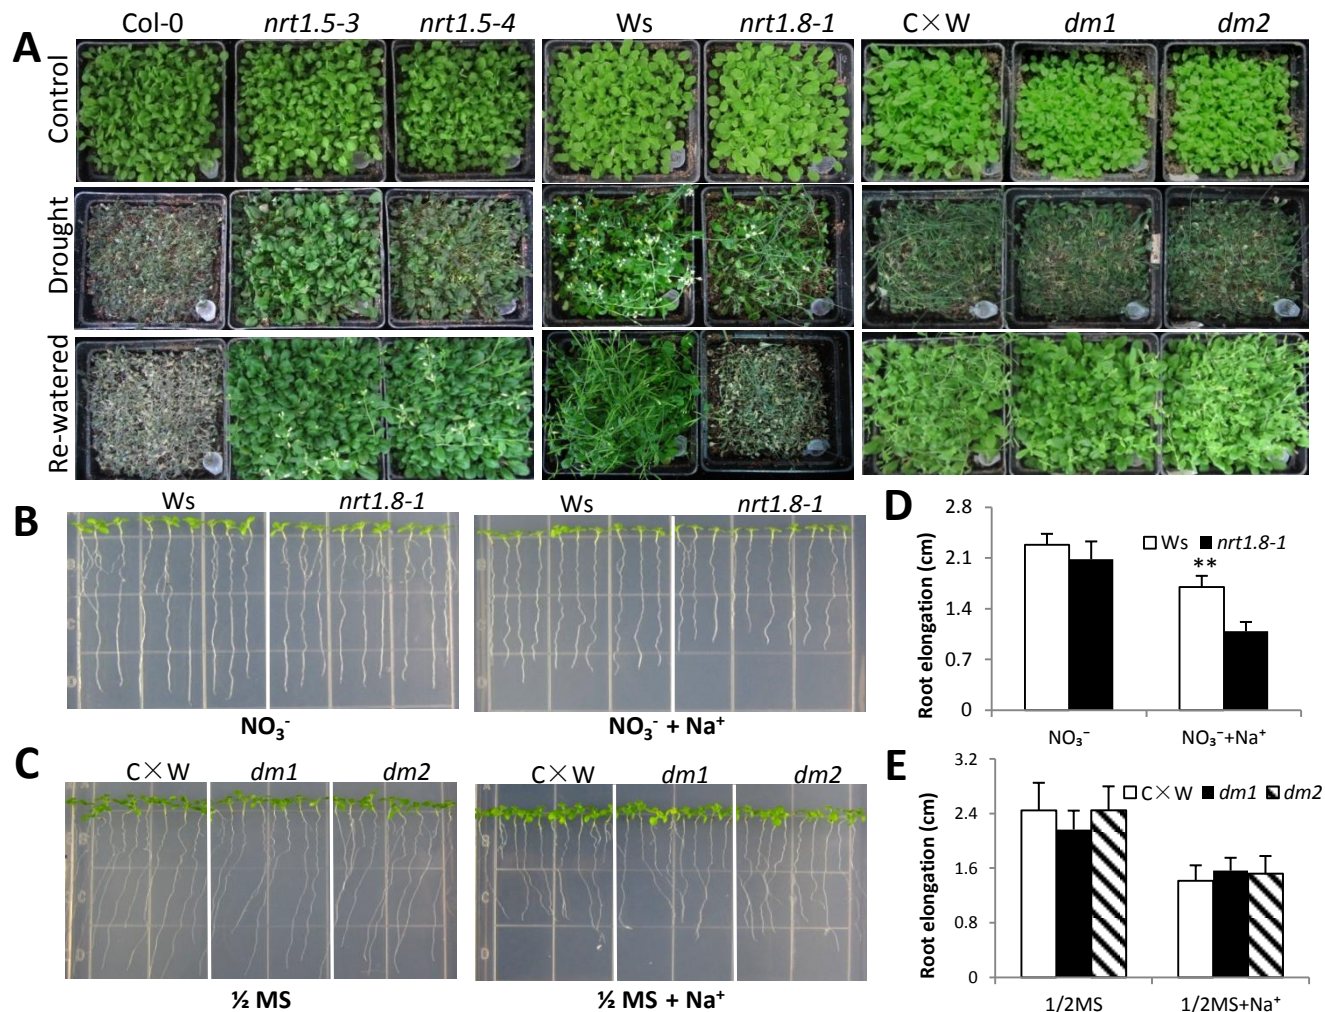

**Figure S2.** *nrt1.8* is sensitive to drought and salt stresses and neutralizes phenotypes observed in *nrt1.5* mutants. (A) Drought tolerance assays were performed as described in Methods. C×W represents hybrids from Col-0 and Ws crosses, *dm1* represents *nrt1.5-3/nrt1.8-1* and *dm2* represents *nrt1.5-4/nrt1.8-1*. (B) 6-day-old seedlings were transferred to  $\frac{1}{4}$ × basal medium supplemented with 25 mM  $\text{NO}_3^-$  (left) or 25 mM  $\text{NO}_3^-$  plus 50 mM NaCl (right), and grown for another 6 days. (C) 5-day-old seedlings were transferred to  $\frac{1}{2}$ × MS or  $\frac{1}{2}$ × MS supplemented with 125 mM NaCl, pictures were taken after 7 days. (D) and (E) Root elongation after transfer to treatments in (B) and (C). Values are mean  $\pm$  SD, n=8. \*\*  $P < 0.01$ .

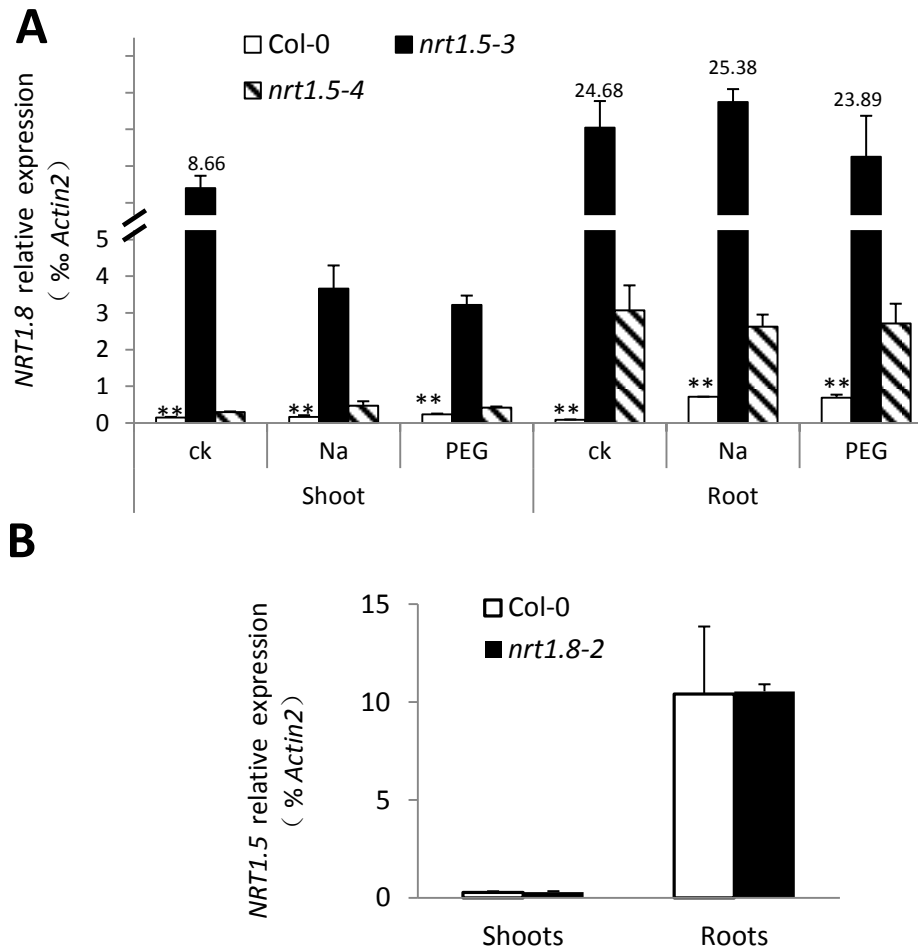

**Figure S3.** Increased *NRT1.8* expression in *nrt1.5* mutants. Plants exposed to 200 mM NaCl for 6h or 10% PEG for 12h or under control condition were subjected to root and shoot sampling. Quantitative RT-PCR was performed to determine *NRT1.8* expression in *nrt1.5* mutants (A) or *NRT1.5* expression in *nrt1.8-2* mutant (B). Data were normalized to *Actin2*, values are mean  $\pm$  SD, n=3. Asterisks indicate significant difference between wild type and the mutant lines at  $P < 0.01$ (\*\*) by *t*-tests.

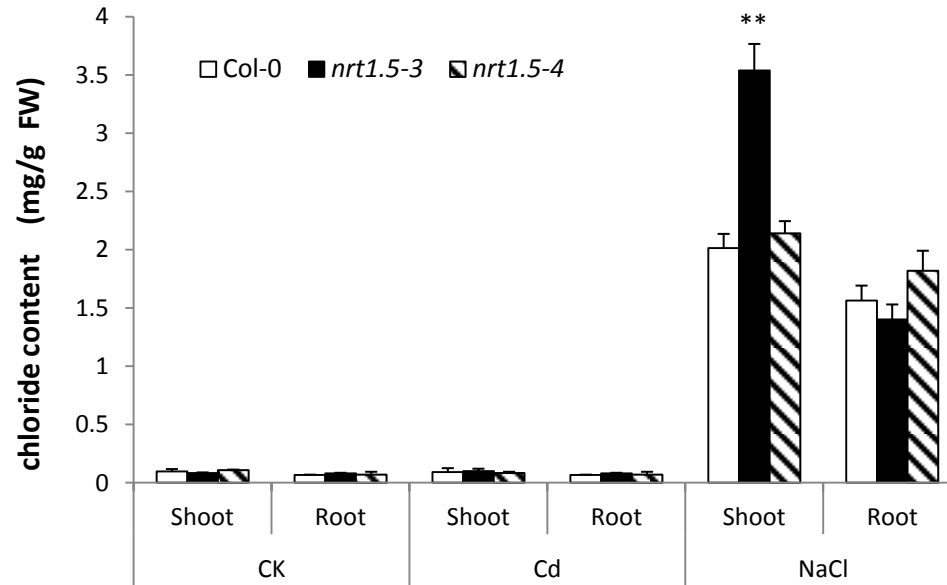

**Figure S4.** Chloride allocation in *nrt1.5* mutants. Plants were grown hydroponically for 4 weeks and then exposed to 50 mM NaCl or 20  $\mu$ M CdCl<sub>2</sub> for 3 days. Chloride concentration in both shoots and roots were determined by Ion Chromatography (IC). Values are mean  $\pm$  SD, n = 8. Asterisks indicate significant difference between wild type and mutant lines at  $P < 0.01$ (\*\*) by *t*- tests.

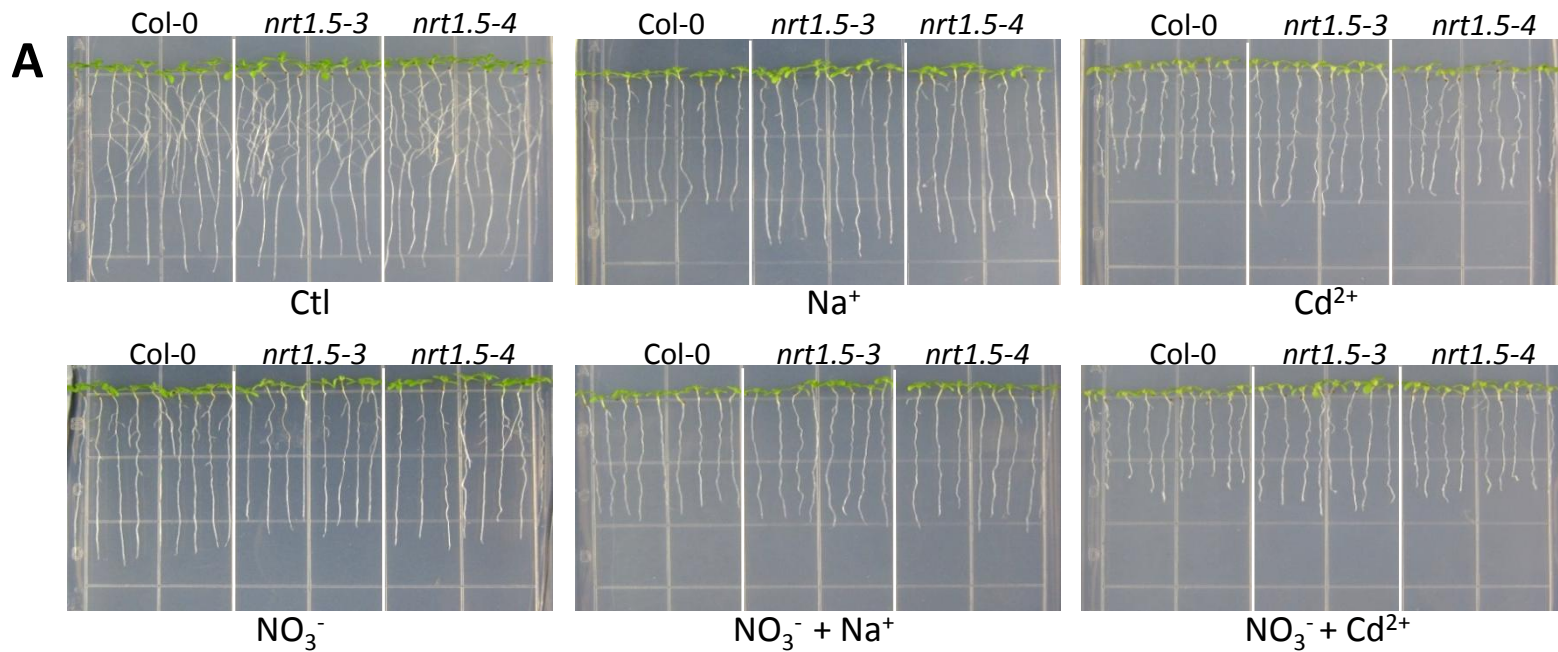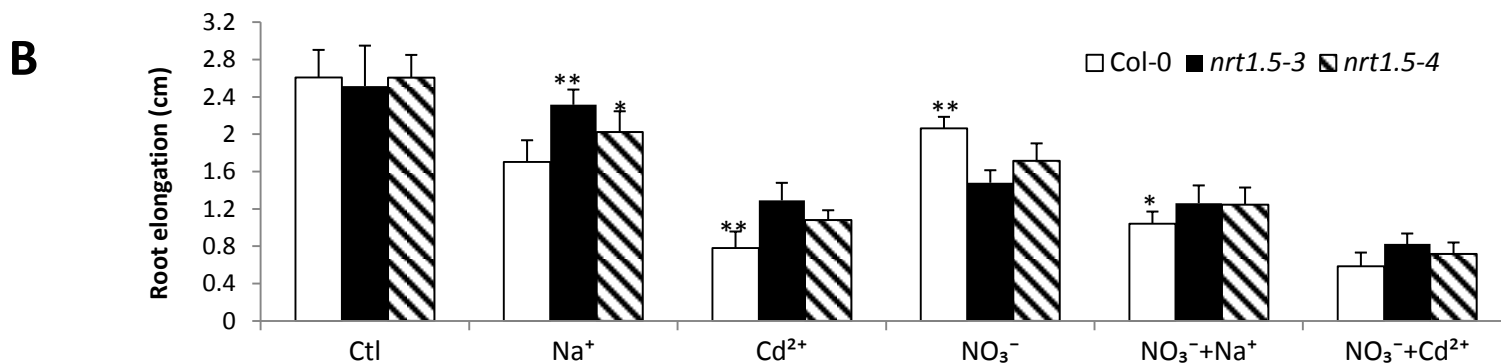

**Figure S5.** Nitrate-dependent growth of *nrt1.5* mutants. (A) 5-day-old seedlings were transferred to ¼ × basal plates with 2.2 mM NO<sub>3</sub><sup>-</sup> (upper left, Ctl), 2.2 mM NO<sub>3</sub><sup>-</sup> plus 50 mM NaCl (upper middle, Na<sup>+</sup>), 2.2 mM NO<sub>3</sub><sup>-</sup> plus 50 μM CdCl<sub>2</sub> (upper right, Cd<sup>2+</sup>), 25mM NO<sub>3</sub><sup>-</sup> (lower left, NO<sub>3</sub><sup>-</sup>), 25mM NO<sub>3</sub><sup>-</sup> plus 50mM NaCl (lower middle, NO<sub>3</sub><sup>-</sup> + Na<sup>+</sup>) or 25mM NO<sub>3</sub><sup>-</sup> plus 50 μM CdCl<sub>2</sub> (lower right, NO<sub>3</sub><sup>-</sup> + Cd<sup>+</sup>). Photographs were taken after an additional growth for 6 days. (B) Quantification of the primary root elongation after transfer to treatments in (A), values are mean ± SD, n=8. Asterisks indicate significant difference between wild type and mutant lines at *P* < 0.05 (\*) or 0.01 (\*\*) by *t*-tests.
